# Supplementary material for: Bromodomain inhibitor I‐BET151 suppresses immune responses during fungal–immune interaction
Source: PubMed Central journal article supplement (PMC6899658; doi:10.1002/eji.201848081), 2019-06-21
Supplement: EJI-49-2044-s001.pdf [file EJI-49-2044-s001.pdf]

# European Journal of Immunology

**Supporting Information**

**for**

**DOI 10.1002/eji.201848081**

Jorge Domínguez-Andrés, Anaísa V Ferreira, Trees Jansen, Nicholas Smithers,  
Rab K. Prinjha, Rebecca C. Furze and Mihai G. Netea

**Bromodomain inhibitor I-BET151 suppresses immune responses during  
fungal–immune interaction**

| Compound Number | Cytokine     | Mean pIC50 | SD   | Range     | Number of curves (n) | Mean Hill Slope | Mean asymptote max |
|-----------------|--------------|------------|------|-----------|----------------------|-----------------|--------------------|
| GSK1210151A     | TNF $\alpha$ | 6,5        | 0,43 | 5.9 - 7.8 | 68                   | 1,3             | 105                |
| GSK1210151A     | IL-6         | 6,1        | 0,36 | 5.5 - 7.8 | 116                  | 1,1             | 98                 |

| % Inhibition | [GSK1210151A] M |          |
|--------------|-----------------|----------|
|              | TNF $\alpha$    | IL-6     |
| 1,25         | 1,10E-08        | 1,50E-08 |
| 2,5          | 1,89E-08        | 2,84E-08 |
| 5            | 3,28E-08        | 5,46E-08 |
| 10           | 5,83E-08        | 1,08E-07 |
| 20           | 1,09E-07        | 2,25E-07 |
| 30           | 1,65E-07        | 3,68E-07 |
| 40           | 2,31E-07        | 5,49E-07 |
| 50           | 3,16E-07        | 7,94E-07 |
| 60           | 4,32E-07        | 1,15E-06 |
| 70           | 6,07E-07        | 1,72E-06 |
| 80           | 9,19E-07        | 2,80E-06 |
| 90           | 1,71E-06        | 5,85E-06 |
| 95           | 3,05E-06        | 1,15E-05 |
| 97,5         | 5,30E-06        | 2,22E-05 |

**Figure S1. Target engagement plots for GSK1210151A (I-BET151).**



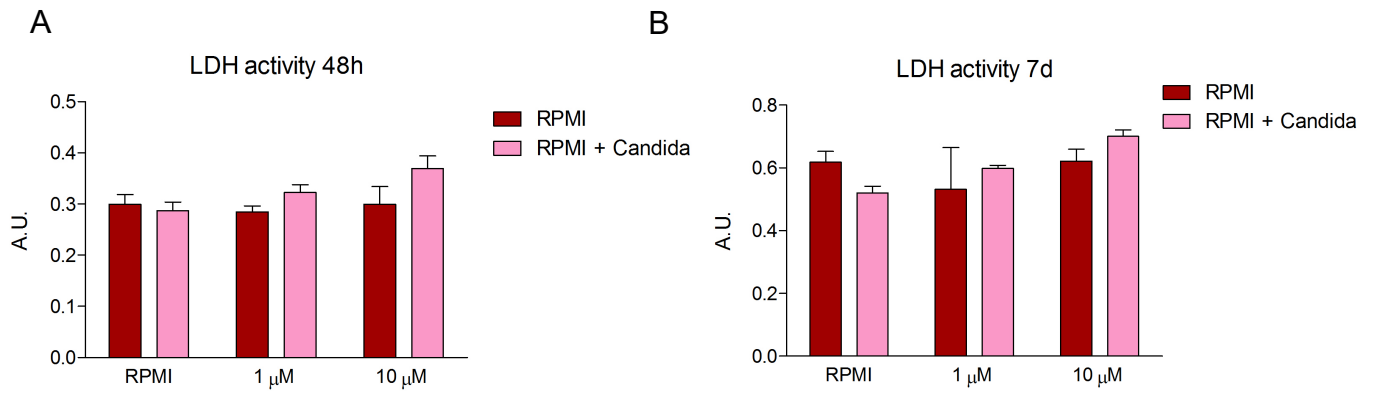

**Figure S2. Cytotoxicity assay for I-BET151 treatment.** Detection of cell death by lactate dehydrogenase (LDH) assay in PBMCs treated with control medium, 1  $\mu$ M or 10  $\mu$ M I-BET151 and stimulated with RPMI or  $10^6$  heat-killed *C. albicans* conidia during 48h (A) or 7 days (B) (mean  $\pm$  SEM, n =3 (from 3 different individual donors)).

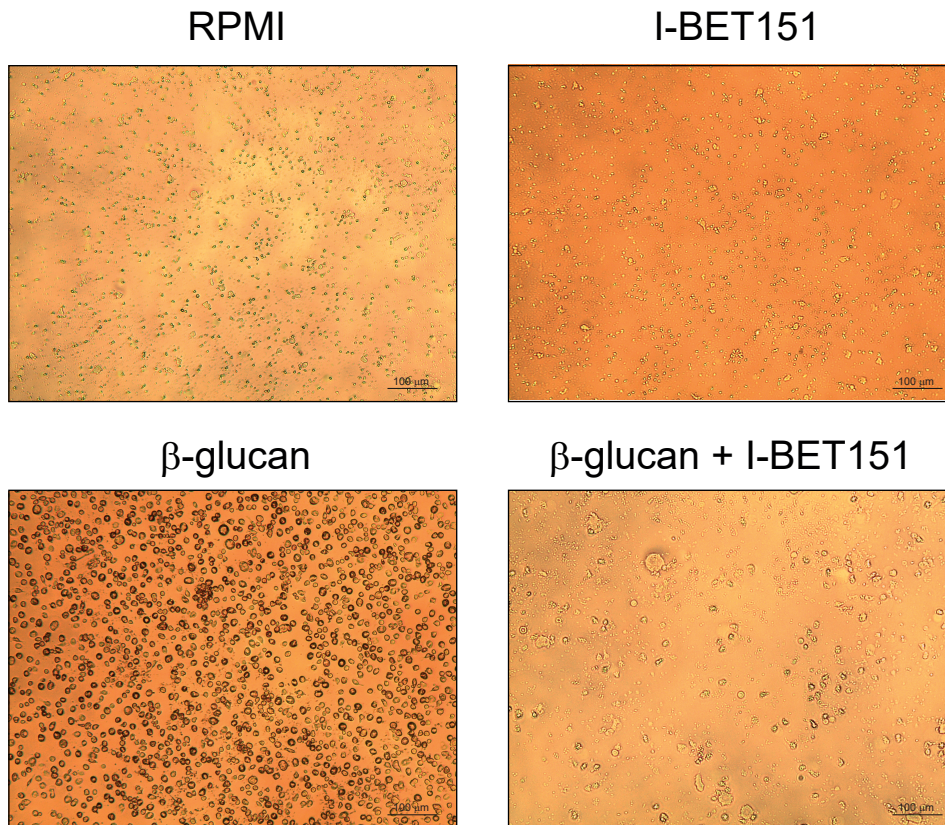

**Figure S3. Morphological changes induced by trained immunity.**

Morphology of cells after 24 h of training and 6 days of rest when the cells were trained with RPMI (negative control), 10 μM I-BET151, 1 mg/ml β-glucan or 10 μM I-BET151 + 1 mg/ml β-glucan. Pictures were taken at day 6, magnification x10.

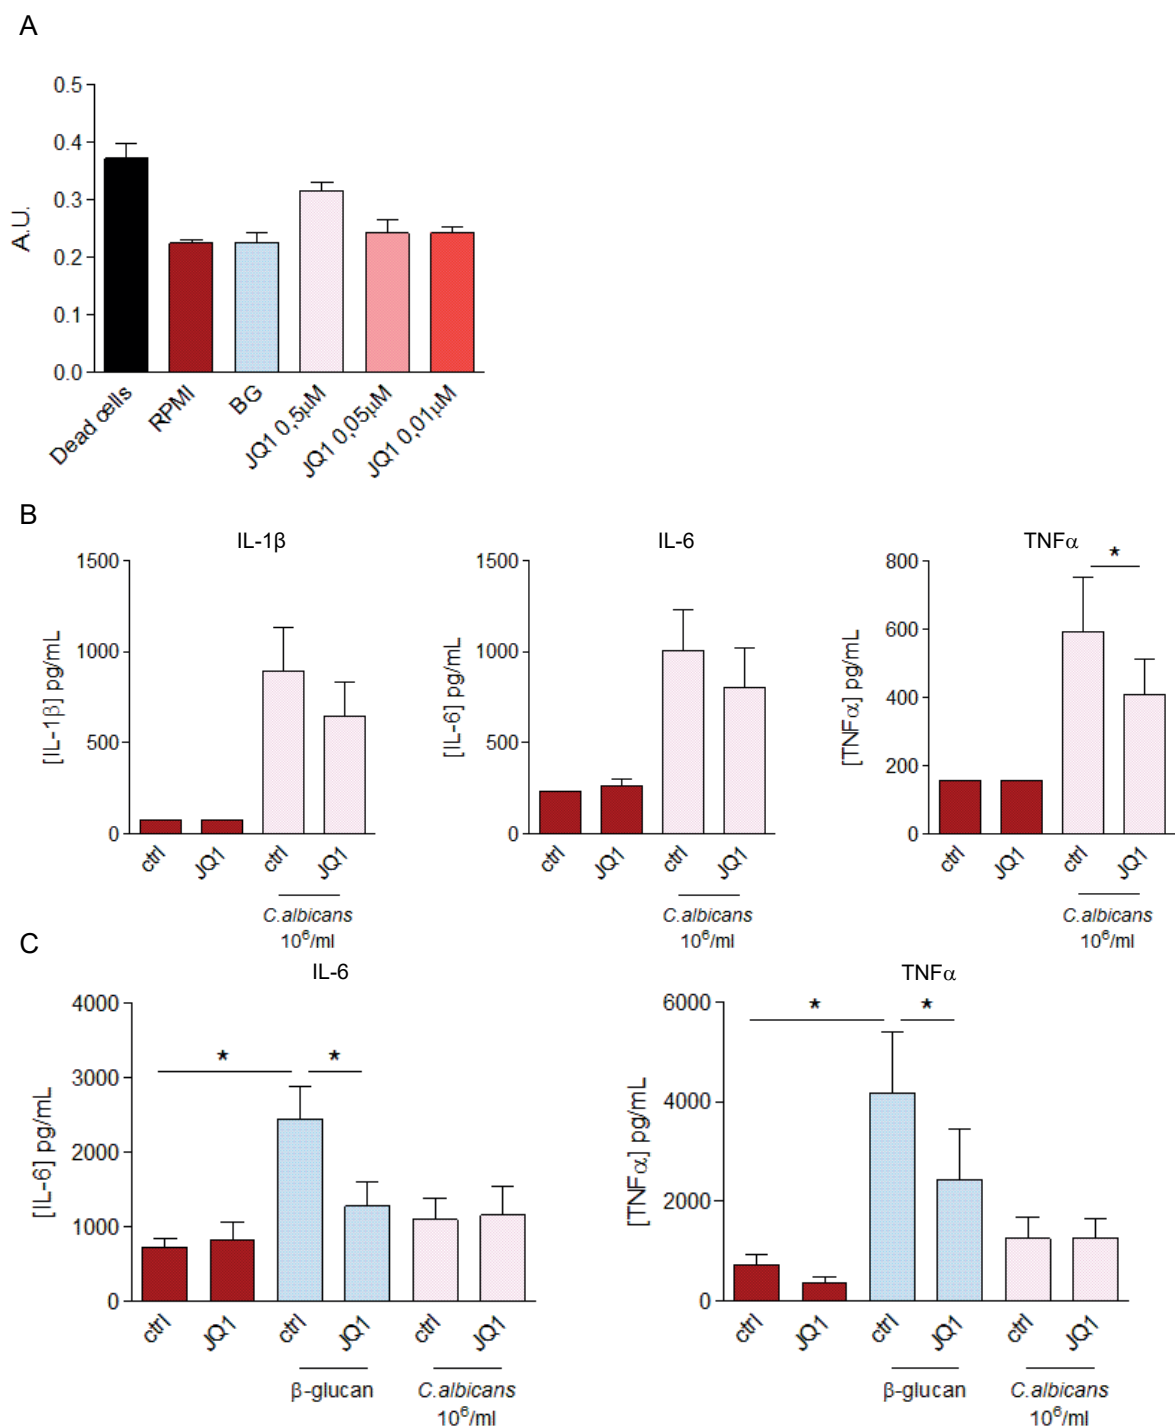

**Figure S4. Effects of JQ1 in the induction of trained immunity.**

(A) Cytotoxicity assay for the treatment of cells with three different concentrations of JQ1. Dead cells were used as a positive control. (B) IL-1 $\beta$ , IL-6 and TNF $\alpha$  production by human monocytes treated or not with 0.05  $\mu$ M JQ1 and stimulated with 10<sup>6</sup>/ml heat-killed *C. albicans* conidia for 24 h. (C) IL-6 and TNF $\alpha$  production by human monocytes treated or not with 0.05  $\mu$ M JQ1 and stimulated with RPMI, 1  $\mu$ g/mL  $\beta$ -glucan or 10<sup>6</sup>/ml heat-killed *C. albicans* conidia, following a similar protocol displayed in Figures 3A and 3D. Cells were re-exposed to 10 ng/ml LPS after 6 days, and cytokines were measured 24 h later. Mean  $\pm$  SEM, n=6 (from 6 different individual donors); pooled from 2 independent experiments with 3 individual donors each. \*p<0.05, Wilcoxon signed-rank test.

1 **Table 1. Primer pairs used for epigenetic study.**

|               |    |                                    |
|---------------|----|------------------------------------|
| <i>IL6.1</i>  | FW | TCGTGCATGACTTCAGCTTT <sup>2</sup>  |
| <i>IL6.1</i>  | RV | GCGCTAAGAAGCAGAACCAC <sup>3</sup>  |
| <i>IL6.2</i>  | FW | AGGGAGAGCCAGAACACAGA               |
| <i>IL6.2</i>  | RV | GAGTTTCCTCTGACTCCATCG <sup>4</sup> |
| <i>TNFA.1</i> | FW | AGAGGACCAGCTAAGAGGGA               |
| <i>TNFA.1</i> | RV | AGCTTGTCAGGGGATGTGG <sup>5</sup>   |
| <i>TNFA.2</i> | FW | GTGCTTGTTCTCAGCCTCT                |
| <i>TNFA.2</i> | RV | ATCACTCCAAAGTGCAGCAG <sup>6</sup>  |
| <i>TNFA.3</i> | FW | TGTCTGGCACACAGAAGACA <sup>7</sup>  |
| <i>TNFA.3</i> | RV | CCCTGAGGTGTCTGGTTTTTC              |
| <i>TNFA.4</i> | FW | AGCCAGCTGTTCTCCTTTA <sup>8</sup>   |
| <i>TNFA.4</i> | RV | TTAGAGAGAGGTCCCTGGGG <sup>9</sup>  |
| <i>TNFA.5</i> | FW | TGATGGTAGGCAGAACTTGG               |
| <i>TNFA.5</i> | RV | ACTAAGGCCTGTGCTGTTCC <sup>10</sup> |
| <i>TNFA.6</i> | FW | CAGGCAGGTTCTCTTCTCT                |
| <i>TNFA.6</i> | RV | GCTTTCAGTGCTCATGGTGT <sup>11</sup> |

12

13

14 **Supplementary Methods**

15

16 **LPS stimulated human blood assay**

17 Blood was collected into 10 IU / mL sodium heparin and incubated for 30 min at 37°C in  
 18 a concentration response (10 µM-0.51nM) of I-BET151, prior to the addition of 200 ng/mL  
 19 LPS. Supernatants were removed after 22h incubation 37°C and analysed for IL-6 and  
 20 TNFα using MesoScaleDiscovery (MSD) technology. ICxx calculations were determined  
 21 using the formula  $IC_{xx} = ((\% \text{ inhibition} / (100 - \% \text{ inhibition}))^{(1/\text{Hill Slope})}) * IC_{50}$ .

22

23 **Viability assays**

24 Cell viability was assessed using CytoTox 96® Non-Radioactive Cytotoxicity Assay  
 25 (Promega). Released LDH in culture supernatants is measured with a 30-minute coupled  
 26 enzymatic assay. The amount of color formed is proportional to the number of lysed cells.
